# Supplementary material for: Construction of an α-Fe2O3/Bi2O3 p–n heterojunction with exceptional visible-light photocatalytic performance for dye removal
Source: Royal Society of Chemistry journal article supplement (doi:10.1039/d0nj02132f), 2022-06-15
Supplement: d0nj02132f1.pdf [file d0nj02132f1.pdf]

### Supporting Information

#### Construction of $\alpha$ -Fe<sub>2</sub>O<sub>3</sub>/Bi<sub>2</sub>O<sub>3</sub> p-n heterojunction with exceptional visible-light photocatalytic performance for dye removal

Rui Lei a, b, c • Jinlong Wei a, c • Wanzhu Hea, c • Xiuqin Aoa, c • Jinqiang Song a, c, \* • Chao Wang a, c, \* • Quanquan Zhang a, c,  
\* • Hao Xie a, c, \* • Jing Li a, c • Jiamiao Ni a, c

<sup>a</sup> Hubei BIM Smart construction international science and technology cooperation base, College of Architecture and Material Engineering, Institute for the Application of Green Energy Materials, Hubei University of Education, Gaoxin Road 129, Wuhan 430205, PR China

<sup>b</sup> State Key Laboratory of Refractories and Metallurgy, Key Laboratory for Ferrous Metallurgy and Resources Utilization of Ministry of Education, Wuhan University of Science and Technology, Wuhan 430081, China

<sup>c</sup> Hubei Environmental Purification Material Engineering Technology Research Center, Institute of Materials Research and Engineering, Hubei University of Education, Gaoxin Road 129, Wuhan 430205, PR China

\*Corresponding author.

Email: 29627593@qq.com (J. Song), [hbsfwc@163.com](mailto:hbsfwc@163.com) (C. Wang), [rollquan999@gmail.com](mailto:rollquan999@gmail.com) (Q. Zhang), [xiehao@hue.edu.cn](mailto:xiehao@hue.edu.cn) (H. Xie)

## **1 Experimental Section**

### **1.1 Chemicals and materials**

All the chemicals were analytical grade reagents and used as received. All the solutions were prepared using double distilled water (DDW). Iron foils (99.5 % purity, Goodfellow) of 1 mm in thickness were sliced into sizes of  $10 \times 10 \text{ mm}^2$ , sonicated in ethanol solution for a few minutes, rinsed with DDW and dried in  $\text{N}_2$  flow.

### **1.2 Synthesis of $\alpha\text{-Fe}_2\text{O}_3$ NTAs**

$\alpha\text{-Fe}_2\text{O}_3$  NTAs was prepared *via* the anodization-calcination method. The pure iron foil was served as the anode and graphite sheet as the counter electrode, respectively. Potentiostatic anodization reaction was carried out in a mixture of 0.35 wt%  $\text{NH}_4\text{F}$  and 3.0 vol% DDW and connected with a direct current power supply (IT6154, ITECH, Nanjing, China) at 55 V for 500 s. Then the samples were cleaned with DDW, placed in the ceramic boat and annealed in a quartz tube furnace. The temperature increased to  $450 \text{ }^\circ\text{C}$  with a heat rate of  $10 \text{ }^\circ\text{C}/\text{min}$  and kept for 2 h.

### **1.3 Preparation of $\alpha\text{-Fe}_2\text{O}_3/\text{Bi}_2\text{O}_3$ NTAs**

$\alpha\text{-Fe}_2\text{O}_3/\text{Bi}_2\text{O}_3$  NTAs was synthesized through a facile hydrothermal process. 1.2 g of bismuth nitrate pentahydrate ( $\text{Bi}(\text{NO}_3)_3 \cdot 5\text{H}_2\text{O}$ ) and 0.5 g of polyvinylpyrrolidone (PVP) were dissolved in 100 mL DDW and agitated for 60 min. The pH value of the mixture was adjusted to 8 by using NaOH solution (0.1 M). The precursor solution was transferred to a 50 mL Teflon-lined autoclave and the anodized foil was immersed in the above precursor. Then the autoclave was sealed into a stainless steel tank and maintained at  $160 \text{ }^\circ\text{C}$  for 1-3 h. Afterwards, the foil was washed with DDW for three times and dried in air at  $60 \text{ }^\circ\text{C}$  for 12 h. The as-synthesized  $\text{Fe}_2\text{O}_3/\text{Bi}_2\text{O}_3$  composites with 1 h, 1.5 h, 2 h, 2.5 h and 3 h were named as FB-1, FB-1.5, FB-2, FB-2.5 and FB-3, respectively. Finally, the precipitate was collected by centrifugation, washed for three times with DDW and dried in air at  $60 \text{ }^\circ\text{C}$  for 12 h to obtain  $\text{Bi}_2\text{O}_3$  powder for further experiments and characterization.

### **1.4 Analytical characterizations**

The field-emission scanning electron microscopy (FE-SEM, FEI Nova 400 Nano, Eindhoven, Netherlands) was employed to examine the morphologies of the samples. Transmission electron microscopy (TEM, JEM-2100UHR STEM/EDS, JEOL, Japan)

and high-resolution transmission electron microscopy (HRTEM) equipped with energy dispersive X-ray spectrometry (EDS) were conducted to investigate crystalline structure. The X-ray diffraction (XRD) pattern was recorded on a X-ray diffractometer with the monochromatized Cu K $\alpha$  radiation over the 2 $\theta$  range of 10°-90° (XRD, Philips X'Pert Pro, Eindhoven, Netherlands). The UV-Vis diffuse reflectance spectroscopy (DRS) were carried out using a double beam UV-Vis spectrophotometer (TU-1901, Purkinje General, Beijing, China) over the wavelength range between 200 and 800 nm.

### 1.5 Photocatalytic performance

The samples were immersed into a quartz reactor comprising 20 mL methylene blue (MB) with original concentration of 5 mg L<sup>-1</sup>. The visible light source was a 500W Xe lamp equipped with an ultraviolet cut-off filter. The quartz vessel was set in a black case whose left was open. The interval between the light source and quartz vessel was 3 cm. To attain the adsorption-desorption balance on the surface of photocatalyst, the solution was agitated for 1 h without visible light irradiation. After equilibration, the concentration of MB was tested as the initial concentration (C<sub>0</sub>). 2 mL MB was taken from the upper part of the solution at 15 min intervals. The concentration of the MB (C) was measured *via* the UV-Vis spectrophotometer at the absorbance peak of 664 nm. The adsorption capacity of the MB dye for the samples was negligible (<6%) after 12 h. The degradation efficiency (DE) of MB was determined using the formula:  $DE=(C_0-C)/C_0$ .

Five successive MB degradation were performed to study the stability of FB-2. After each photocatalytic run, the sample was extracted, rinsed with DDW, air-dried and reused. Then the photocatalyst was placed into the new MB solution to carry out the circular reaction.

The primary reactive species of hydroxyl radicals ( $\bullet$ OH), holes (h<sup>+</sup>) and superoxide radicals ( $\bullet$ O<sub>2</sub><sup>-</sup>) generated in the degradation procedure were detected through radical trapping tests. Similar experimental procedures over FB-2 were carried out except that diverse scavengers, containing 1 mM of p-benzoquinone (BQ), 1 mM of disodium ethylenediaminetetraacetate (EDTA) and 1 mM of methanol, were added into MB (25 ml, 5 mg L<sup>-1</sup>). The total organic carbon (TOC) content was

determined using a Shimadzu TOC 5000A analyzer. In the TOC test, FB-2 was dispersed in MB solution ( $5 \text{ mg L}^{-1}$ , 50 mL).

### **1.6 Photoelectrochemical measurement**

Photocurrent density and electrochemical impedance spectroscopy (EIS) were measured on CHI 660E electrochemical workstation (CH Instruments, Shanghai, China). The as-prepared foil was employed as the working electrode, platinum wire as the counter electrode and Ag/AgCl (saturated with KCl) as the reference electrode, respectively. 0.1 M  $\text{Na}_2\text{SO}_4$  aqueous solution was employed as electrolyte. The photoelectric response measurements were operated at 0.8 V bias vs Ag/AgCl with the 500 W Xenon lamp on-off switches of 20 s. EIS curves were recorded by applying an AC voltage of 5 mV.
